# Supplementary material for: Designing in situ nanostructured MWCNT-phloroglucinol modified webs for electrochemical-based dual screening of stress biomarkers
Source: Royal Society of Chemistry journal article supplement (doi:10.1039/d5cp03743c), 2026-01-01
Supplement: d5cp03743c1.pdf [file d5cp03743c1.pdf]

## Supporting Information

### **Designing of *in-situ* nanostructured MWCNT- Phloroglucinol modified webs for electrochemical-based dual screening of stress biomarkers**

Mansi Gandhi<sup>a</sup>, Anitha Varghese<sup>a\*</sup>

<sup>a</sup> *Department of Chemistry, CHRIST (Deemed to be University), Hosur Road, Bengaluru-560029, India.*

Corresponding authors [Email: \\*anitha.varghese@christuniversity.in](mailto:*anitha.varghese@christuniversity.in)

**Statement of the problem addressed/Originality of the approach:** This work accounts for the selective sensing of stress biomarker *i.e.*, glutathione (GT) and hydrogen peroxide (H<sub>2</sub>O<sub>2</sub>) both in pH 7 buffer media. This work involves an eco-friendly approach for a Point-of-care testing of specific analytes in the presence of interferences.

**Contribution of the work to create new knowledge in the field:** This work incorporated the fabrication of a novel *in-situ* electrochemical platform involving transformation of a phyto-constituent *i.e.*, Phloroglucinol (benzene 1,3,5-triol ) using Cyclic Voltammetric Technique in aqueous media on a GCE platform. This concept enables a sustainable approach using a glassy carbon modified multiwalled carbon nanotube-chitosan polymer based electrode (GCE/MWCNT-Chit@PG-Redox) based system.

**Relevance of the work to advance research and impact to the field of food science and technology:** This work is quite relevant for the development of a sustainable platform, which is eco-friendly and food-science-derived phloroglucinol-based sensor. Phloroglucinol, found in various plants, is an essential phenolic compound and a vital tannin.

## **Supporting Information Table of Contents:**

**S1:** Schematic representation for the organic transformation

**SF1:** Scanning electron microscopy images

**SF2:** Optical Profilometry 2D images

**SF3:** Raman data

**SF4:** Differential pulse voltammetric (DPV) signals of GCE/MWCNT-Chit@PG-Redox platform using GT concentration range in buffer media, its calibration plot and its interference effect.

**SF5:** Real sample analysis

**SF6:** Differential pulse voltammetric (DPV) signals of GCE/MWCNT-Chit@PG-Redox platform using H<sub>2</sub>O<sub>2</sub> concentration range in buffer media, its calibration plot and its interference effect.

**SF7:** Real sample analysis

**ST1:** Tables for real sample analysis (GT)

**ST1:** Tables for real sample analysis (H<sub>2</sub>O<sub>2</sub>)

## List of Supplementary Schemes, Figures and Tables

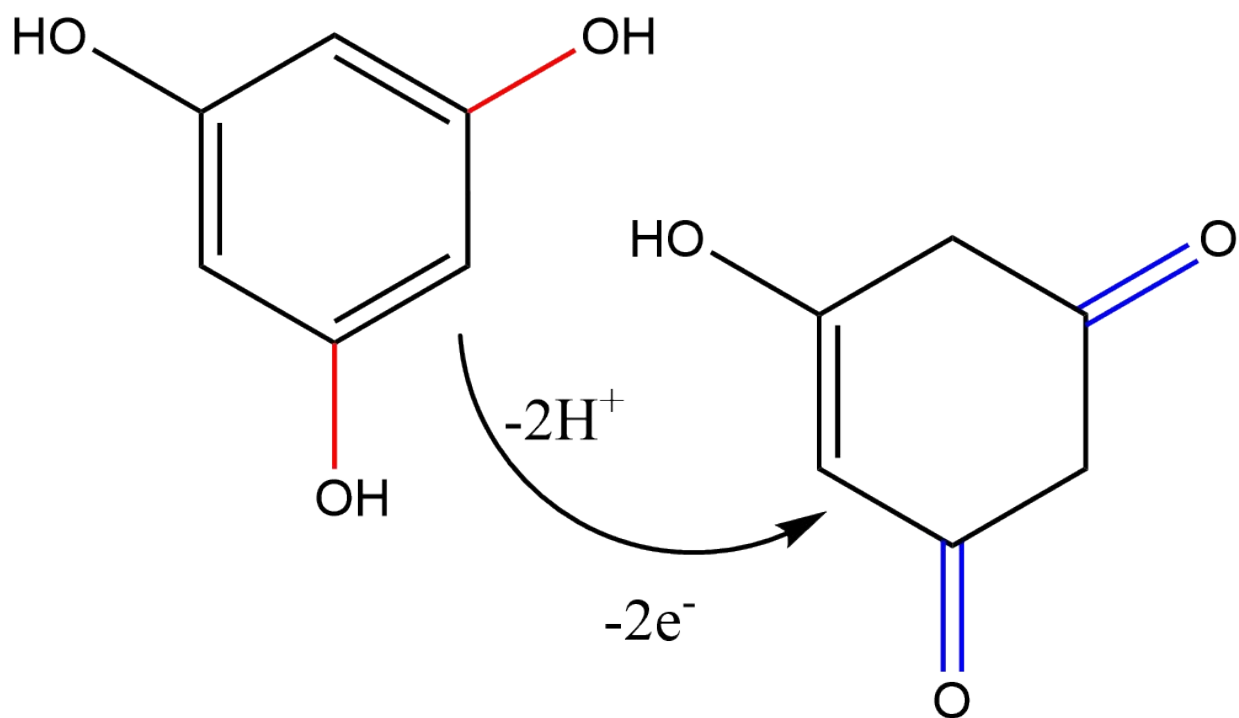

**Supplementary Scheme. S1** Schematic representation for the organic transformation of phloroglucinol under electrochemical treatment in pH 7 aqueous buffer media.

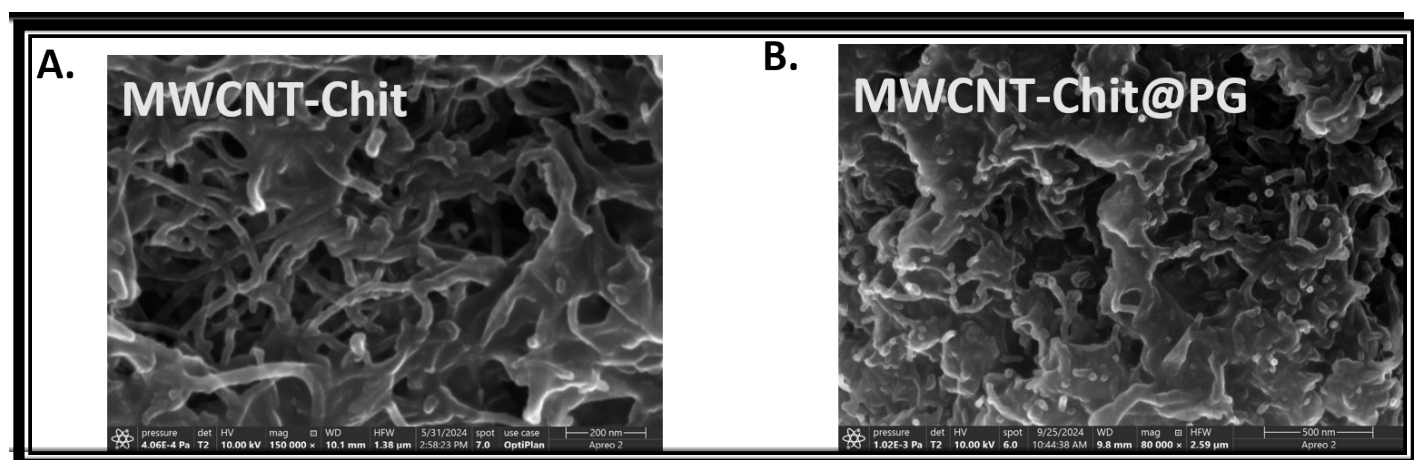

**Supplementary Figure. SF1** Scanning electron microscopic images for the MWCNT-Chit (a.) and MWCNT-Chit@PG-redox (b.).

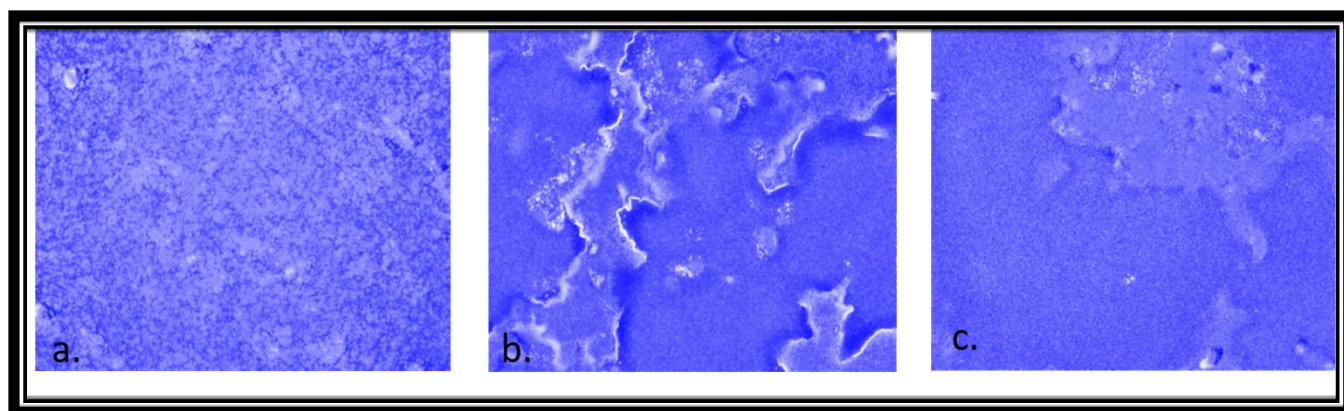

**Supplementary Figure. SF2** Optical Profilometry 2D images of screen printed carbon electrode (SPCE) (a), MWCNT-Chit (b) and MWCNT-Chit@PG (c) prepared in a SPCE surface.

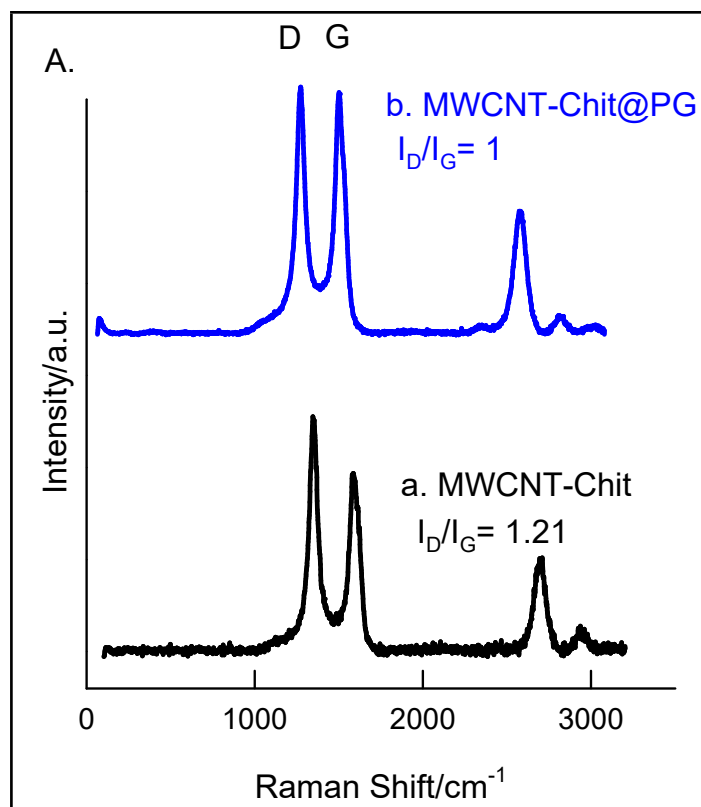

**Supplementary Figure. SF3** Raman spectroscopic response of SPCE/MWCNT-Chit (curve a) and SPCE/MWCNT-Chit@PG (curve b). Note: SPCE= Screen printed carbon electrodes.

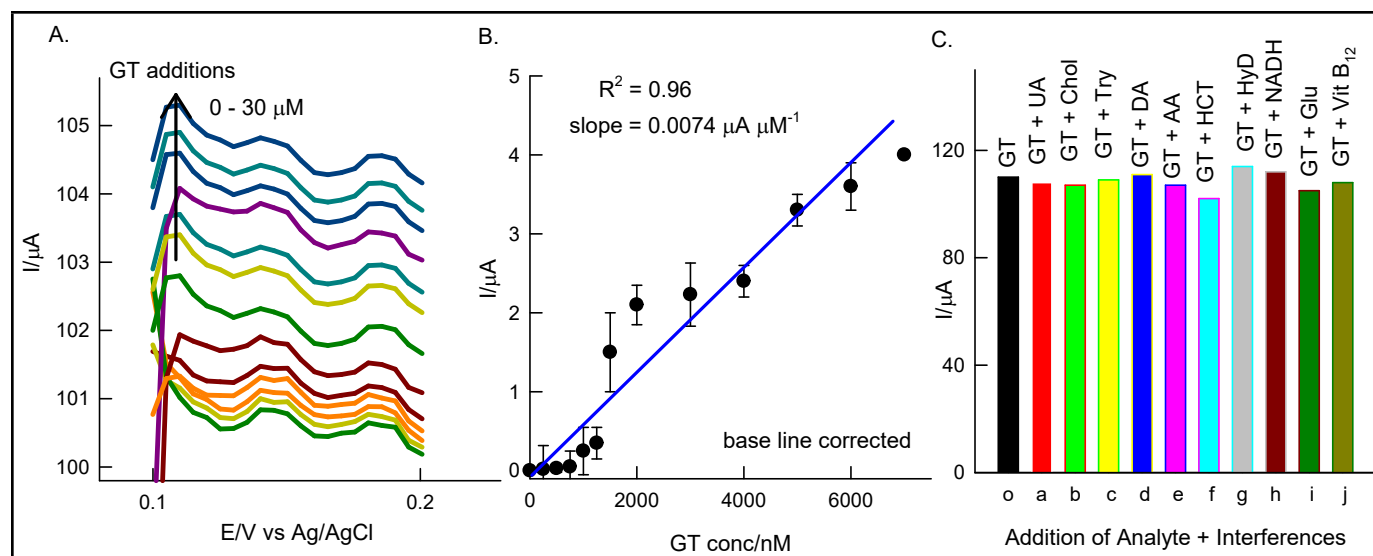

**Supplementary Figure. SF4** (A) Differential pulse voltammetric (DPV) signals of GCE/MWCNT-Chit@PG-Redox platform using GT concentration range in buffer media Note: Optimal DPV conditions are: initial potential= 0 V; final potential= 0.2 V; increment potential= 0.004 V; amplitude= 0.05 V; pulse width= 0.06 s; pulse period= 0.5 s. (B) Respective calibration graph for DPV concentration effect with their error bars after triplicate analysis. (C) Effect of interfering chemicals along with glutathione (GT) (hydrodynamic conditions) in buffer media.



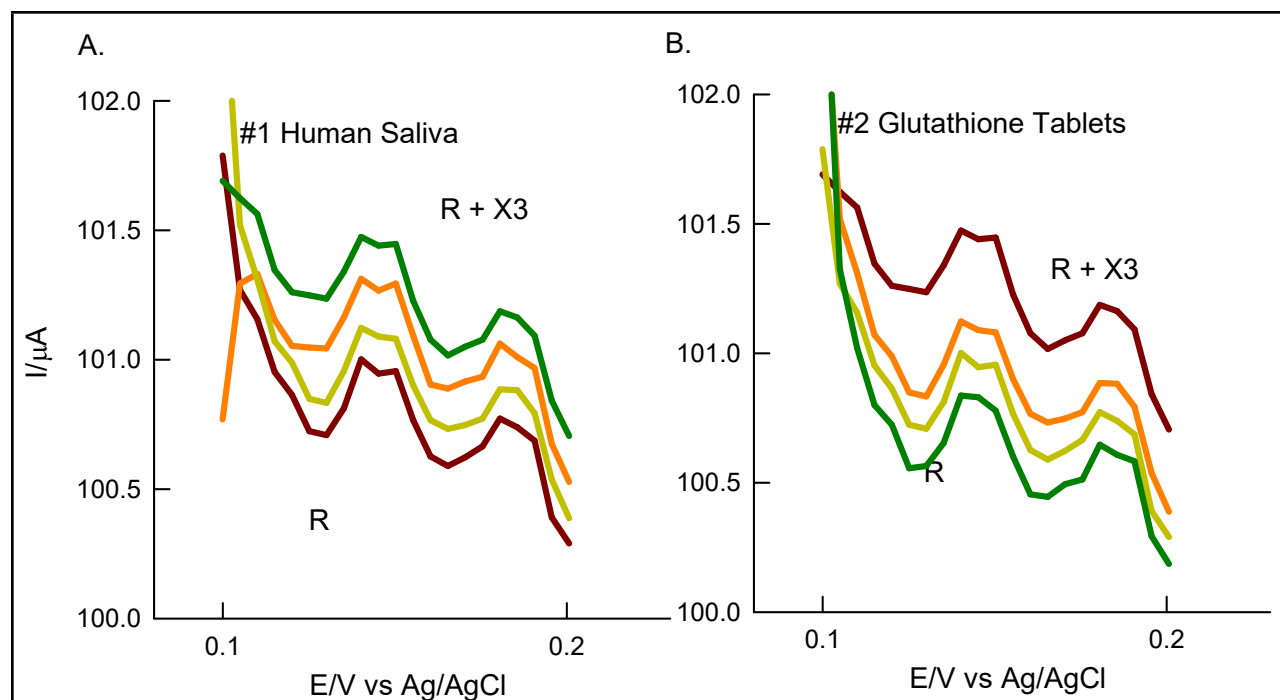

**Supplementary Figure. SF5** (A) Differential pulse voltammetric (DPV) signals of GCE/MWCNT-Chit@PG-Redox platform using real samples (#1 Human Saliva, #2 Glutathione Tablets using standard addition approach with successive additions of GT dissolved in buffer media after 1:1 dilution). Note: Optimal DPV conditions are: initial potential= 0 V; final potential= 0.2 V; increment potential= 0.004 V; amplitude= 0.05 V; pulse width= 0.06 s; pulse period= 0.5 s.

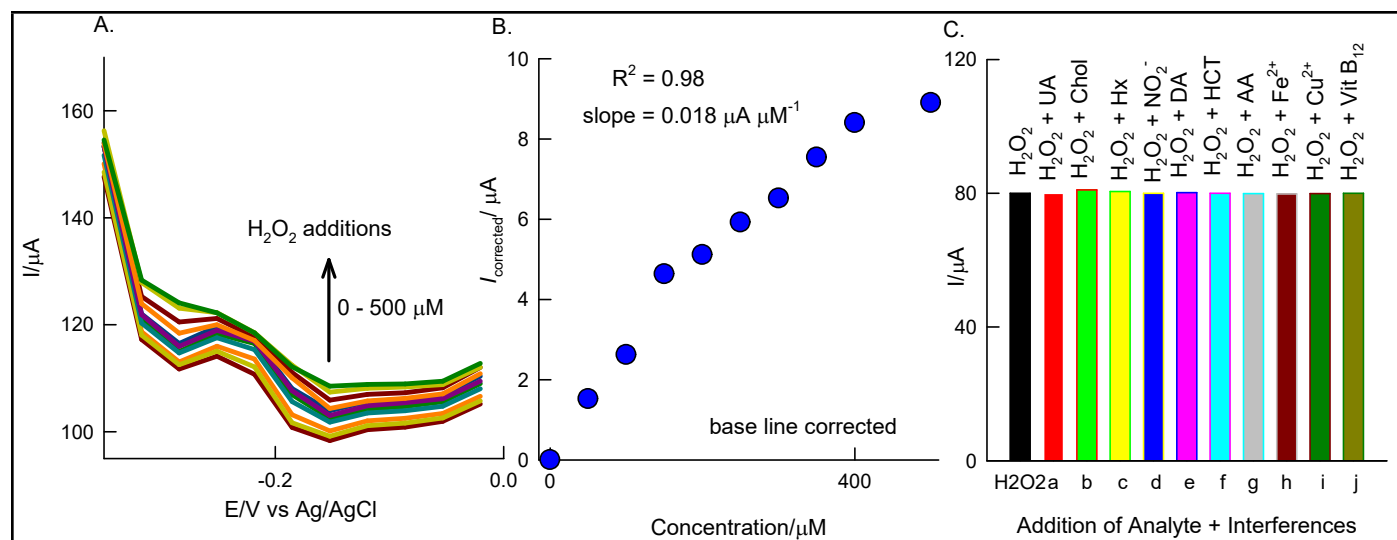

**Supplementary Figure. SF6** (A) Differential pulse voltammetric signals GCE/MWCNT-Chit@PG-Redox platform on successive additions of hydrogen peroxide ( $\text{H}_2\text{O}_2$ ) dissolved in pH 7 PBS. (B) Plots of  $i_{pa}$  vs. analyte additions (base line corrected). (C) Effect of interfering chemicals along with hydrogen peroxide ( $\text{H}_2\text{O}_2$ ) (hydrodynamic conditions) in buffer media. Note: Optimal DPV conditions are: initial potential= 0.4 V; final potential= 0 V; increment potential= 0.004 V; amplitude= 0.05 V; pulse width= 0.06 s; pulse period= 0.5 s.

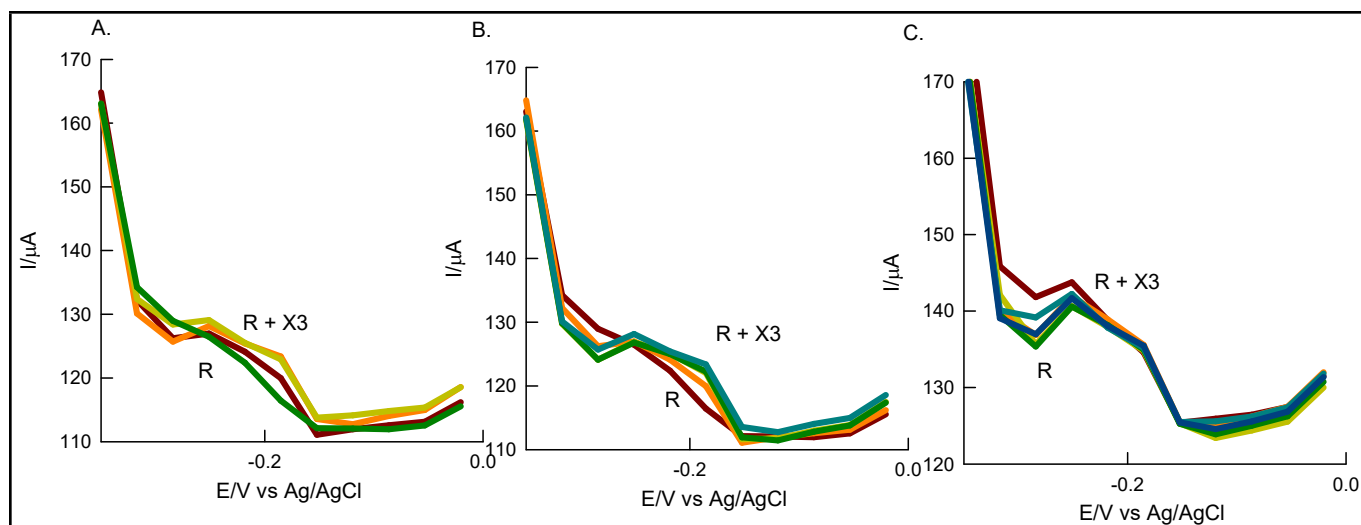

**Supplementary Figure. SF7** Differential pulse voltammetric (DPV) signals of GCE/MWCNT-Chit@PG-Redox platform using real samples (#1 Orange juice (packaged), #2 Orange juice (real), #3 Milk sample) using standard addition approach with successive additions of hydrogen peroxide ( $\text{H}_2\text{O}_2$ ) dissolved in buffer media after 1:1 dilution. DPV parameters as SF4.

**Supplementary Table ST1** Detection of glutathione (GT) added and found in various real samples (#1 Human Saliva, #2 Glutathione Tablets using standard addition approach with successive additions of GT dissolved in buffer media after 1:1 dilution with buffer

| S. No. | Sample             | Analyte | Spiked Value (nM) | Found Value (nM) | Recovery Percentage (%) |
|--------|--------------------|---------|-------------------|------------------|-------------------------|
| 1.     | Human Saliva       | R       | -                 |                  |                         |
|        |                    | R +X1   | 150               | 170              | 120                     |
|        |                    | R+X2    | 300               | 300              | 100                     |
|        |                    | R+X3    | 500               | 680              | 134                     |
|        |                    |         |                   |                  |                         |
| 2.     | Glutathione Tablet | R       | -                 |                  |                         |
|        |                    | R +X1   | 150               | 180              | 120                     |
|        |                    | R+X2    | 300               | 300              | 100                     |
|        |                    | R+X3    | 700               | 690              | 98.7                    |

**Supplementary Table ST2** Detection of hydrogen peroxide (H<sub>2</sub>O<sub>2</sub>) added and found in various real samples (#1 Orange juice (packaged), #2 Orange juice (real), #3 Milk samples) after 1:1 dilution with buffer

| S. No. | Sample                     | Analyte | Spiked Value (μM) | Found Value (μM) | Recovery Percentage (%) |
|--------|----------------------------|---------|-------------------|------------------|-------------------------|
| 1.     | Orange juice (packaged) #1 | R       | -                 |                  |                         |
|        |                            | R +X1   | 50                | 45               | 90                      |
|        |                            | R+X2    | 100               | 88.5             | 88.5                    |
|        |                            | R+X3    | 250               | 245              | 98                      |
| 2.     | Orange juice (real) #2     | R       | -                 |                  |                         |
|        |                            | R +X1   | 100               | 110              | 110                     |
|        |                            | R+X2    | 150               | 170              | 113                     |
|        |                            | R+X3    | 200               | 205              | 102.5                   |
| 3.     | Milk samples #3            | R       | -                 |                  |                         |
|        |                            | R +X1   | 50                | 43.25            | 86.5                    |
|        |                            | R+X2    | 100               | 91               | 91                      |
|        |                            | R+X3    | 150               | 110              | 73.5                    |
